# Supplementary material for: Charitable Motives and Bidding in Charity Auctions
Source: Atypon-hosted journal article supplement (doi:10.1287/mnsc.1090.1120), 2010-02-13
Supplement: mnsc.1090.1120-sm-ec.pdf [file mnsc.1090.1120-sm-ec.pdf]

**e - c o m p a n i o n**

ONLY AVAILABLE IN ELECTRONIC FORM

Electronic Companion—"Charitable Motives and Bidding  
in Charity Auctions" by Peter T. L. Popkowski Leszczyc and  
Michael H. Rothkopf, *Management Science*,  
DOI 10.1287/mnsc.1090.1120.

---

**Popkowski Leszczyc, Peter T. L. and Michael H. Rothkopf (2009), Charitable Motives and Bidding in Charity Auctions**

**Web Appendix**

**Table A1: List of Products used in Experiment 1 and Parameter Estimates of Fixed Effects Product Dummy Variables**

|    | <b>Product Description</b>                 | <b>Product Category</b> | <b>Parameter estimates</b> | <b>Standard error</b> |
|----|--------------------------------------------|-------------------------|----------------------------|-----------------------|
| 1  | PINK FLOYD Darkside of the moon.           | CD                      | 2.594                      | 0.240                 |
| 2  | BARENAKED LADIES Greatest Hits,            | CD                      | 2.728                      | 0.235                 |
| 3  | JAMES TAYLOR, greatest hits Vol 2,         | CD                      | 2.398                      | 0.235                 |
| 4  | PHIL COLLINS, greatest hits.               | CD                      | 2.879                      | 0.235                 |
| 5  | ERIC CLAPTON, Just One Night.              | CD                      | 2.319                      | 0.235                 |
| 6  | LED ZEPPELIN, Physical Graffiti.           | CD                      | 2.410                      | 0.240                 |
| 7  | PinK FLOYD Echoes: The Best Of Pink Floyd. | CD                      | 3.273                      | 0.235                 |
| 8  | JOHN LENNON, Legend the very best.         | CD                      | 2.763                      | 0.240                 |
| 9  | STEVE MILLER BAND, Young Hearts            | CD                      | 3.227                      | 0.235                 |
| 10 | The best of R.E.M. New.                    | CD                      | 3.145                      | 0.235                 |
| 11 | TONY BENNETT, The Essential                | CD                      | 3.531                      | 0.240                 |
| 12 | SIMON AND GARFUNKEL, greatest hits.        | CD                      | 3.116                      | 0.235                 |
| 13 | THE DOORS: The Absolute Best               | CD                      | 3.295                      | 0.240                 |
| 14 | BARBRA STREISAND: greatest hits.           | CD                      | 3.694                      | 0.235                 |
| 15 | BOB DYLAN: The essential bob dylan.        | CD                      | 3.656                      | 0.235                 |
| 16 | DAVID BOWIE: Aladdin sane 2 CD pack        | CD                      | 3.655                      | 0.240                 |
| 17 | QUEEN: Live killers.                       | CD                      | 3.705                      | 0.235                 |
| 18 | Collection of Polish Mint Stamps           | collectable stamps      | 3.368                      | 0.235                 |
| 19 | 500++ Worldwide mint stamps                | collectable stamps      | 3.438                      | 0.240                 |
| 20 | 40+ Beautiful Souvenir sheets              | collectable stamps      | 4.795                      | 0.235                 |
| 21 | 40+ Beautiful Souvenir sheets              | collectable stamps      | 4.499                      | 0.235                 |
| 22 | 250+ Mint Older Canadian stamps            | collectable stamps      | 3.303                      | 0.240                 |
| 23 | Collection of Canadian FDC's               | collectable stamps      | 3.617                      | 0.235                 |
| 24 | 50 DVD-R Spindle                           | Computer                | 4.119                      | 0.240                 |
| 25 | HP 50-Pack 8x DVD+R (4.7GB) in Spindle     | Computer                | 4.544                      | 0.235                 |
| 26 | Gateway 32MB USB Flash Drive               | Computer                | 5.015                      | 0.235                 |
| 27 | Gateway 32MB USB Flash Drive               | Computer                | 4.656                      | 0.235                 |
| 28 | Rio 128MB MP3 Player                       | Computer                | 3.739                      | 0.235                 |
| 29 | 512MB 2.0 Full Speed USB Flash Drive       | Computer                | 3.697                      | 0.240                 |
| 30 | Kensington PocketMouse Mini                | Computer                | 2.651                      | 0.235                 |
| 31 | Microsoft Wireless Intelli mouse           | Computer                | 2.346                      | 0.240                 |
| 32 | New Uniden 900 Mhz phone caller id & answ. | Electronics             | 2.686                      | 0.240                 |
| 33 | New Uniden 2.4 ghz phone                   | Electronics             | 2.647                      | 0.235                 |
| 34 | New Toshiba SD-430V DVD Player             | Electronics             | 2.832                      | 0.270                 |
| 35 | New Hitachi DV-P745U DVD Player            | Electronics             | 2.652                      | 0.235                 |
| 36 | RCA CD Player                              | Electronics             | 2.685                      | 0.235                 |
| 37 | Curtis CD Player                           | Electronics             | 2.353                      | 0.240                 |

**Table A1: List of Products used in Experiment 1 and Parameter Estimates of Fixed Effects Product Dummy Variables (continued)**

|    | <b>Product Description</b>                          | <b>Product Category</b> | <b>Parameter estimates</b> | <b>Standard error</b> |
|----|-----------------------------------------------------|-------------------------|----------------------------|-----------------------|
| 38 | GPX Wake-up Clock Radio                             | Electronics             | 3.606                      | 0.235                 |
| 39 | Milano Desk Lamp                                    | Electronics             | 2.760                      | 0.235                 |
| 40 | Cyber Acoustics ACM-90 Stereo Headphones            | Electronics             | 2.860                      | 0.235                 |
| 41 | Digicom 4AA 2150 mAh Batteries with Charger         | Electronics             | 3.426                      | 0.240                 |
| 42 | CD-Clock radio                                      | Electronics             | 4.349                      | 0.235                 |
| 43 | Picture Frame and Clock                             | Electronics             | 2.479                      | 0.240                 |
| 44 | \$50 Gift Certificate for Cowboys                   | gift certificate        | 3.451                      | 0.235                 |
| 45 | Gift Certificate for 24 Cookies - Cookies by Geo    | gift certificate        | 3.445                      | 0.235                 |
| 46 | \$20 Gift Certificate for Campus Jewellers          | gift certificate        | 2.696                      | 0.235                 |
| 47 | \$40 Gift Certificate for Campus Jewellers          | gift certificate        | 3.498                      | 0.235                 |
| 48 | Gift Certificate for 24 Cookies - Cookies by George | gift certificate        | 3.545                      | 0.235                 |
| 49 | Burmese Hanging Carpet (small)                      | handycrafts             | -1.590                     | 0.240                 |
| 50 | Burmese Hanging Carpet (large)                      | handycrafts             | 1.380                      | 0.234                 |
| 51 | Thai lacquer art - set of 3 Apples                  | handycrafts             | 2.651                      | 0.235                 |
| 52 | Thai lacquer art - set of 4 Ducks                   | handycrafts             | 2.773                      | 0.240                 |
| 53 | Thai lacquer art - set of 3 Peacocks                | handycrafts             | 2.688                      | 0.240                 |
| 54 | Thai lacquer art - set of 3 Elephants               | handycrafts             | 3.183                      | 0.235                 |
| 55 | Thai lacquer art - set of 4 Standing cats           | handycrafts             | 2.456                      | 0.235                 |
| 56 | Thai lacquer art - set of 3 Pears                   | handycrafts             | 3.216                      | 0.235                 |
| 57 | Two Handmade Burmese Hand bags                      | handycrafts             | 2.161                      | 0.240                 |
| 58 | New in a box 16 piece Cutlery set                   | Household               | 3.660                      | 0.240                 |
| 59 | High Quality Binoculars                             | Household               | 4.070                      | 0.235                 |
| 60 | Geneva His & Her Watch Set                          | jewelry                 | 4.147                      | 0.235                 |
| 61 | Geneva His & Her Watch Set                          | jewelry                 | 4.211                      | 0.235                 |
| 62 | Pocket Fashion Watch                                | jewelry                 | 2.836                      | 0.240                 |
| 63 | Pocket Fashion Watch                                | jewelry                 | 2.992                      | 0.271                 |
| 64 | White Pearl Earrings                                | jewelry                 | 3.456                      | 0.240                 |
| 65 | Black Pearl Earrings                                | jewelry                 | 3.765                      | 0.235                 |
| 66 | Celebrity watch & pen set                           | jewelry                 | 3.242                      | 0.235                 |
| 67 | SUISSE Watch                                        | jewelry                 | 3.402                      | 0.235                 |
| 68 | SUISSE Watch                                        | jewelry                 | 3.643                      | 0.240                 |
| 69 | Beautiful Musical Box                               | jewelry                 | 2.990                      | 0.235                 |
| 70 | Gold heart pendant & chain                          | jewelry                 | 3.587                      | 0.235                 |
| 71 | Gold heart pendant                                  | jewelry                 | 2.932                      | 0.235                 |
| 72 | Canadian Mint Stamps (\$30+ Face Value)             | postage                 | 3.587                      | 0.235                 |
| 73 | Canadian Mint Stamps (\$30+ Face Value)             | postage                 | 3.560                      | 0.240                 |
| 74 | Canadian Mint Stamps (\$30+ Face Value)             | postage                 | 3.644                      | 0.235                 |
| 75 | Collection of 200+ Mint UN Stamps                   | postage                 | 3.736                      | 0.240                 |
| 76 | Collection of 100+ Mint UN Stamps                   | postage                 | 3.427                      | 0.235                 |
| 77 | 200+ Mint USA Stamps                                | postage                 | 3.701                      | 0.241                 |

**Table A2: List of Products used in Experiment 2 and Parameter Estimates of Fixed Effects Product Dummy Variables**

|    | <b>Product Description</b>                        | <b>Product Category</b> | <b>Parameter estimates</b> | <b>Standard error</b> |
|----|---------------------------------------------------|-------------------------|----------------------------|-----------------------|
| 1  | Neil Young – Greatest Hits                        | CD's                    | 3.309                      | 0.516                 |
| 2  | The Best of James Taylor                          | CD's                    | 4.184                      | 0.503                 |
| 3  | John Lennon Legend                                | CD's                    | 2.862                      | 0.490                 |
| 4  | Doors the absolute best – 2disks                  | CD's                    | 3.567                      | 0.490                 |
| 5  | Crosby, Stills & Nash Greatest Hits               | CD's                    | 3.170                      | 0.503                 |
| 6  | Leonard Cohen – Greatest Hits                     | CD's                    | 3.166                      | 0.516                 |
| 7  | Collection of over 200 Mint United Nations Stamps | Collectables            | 2.353                      | 0.516                 |
| 8  | Targus 15.4" Ricket Backpack Black/Grey           | Computer                | 2.555                      | 0.503                 |
| 9  | Ultra Mini Bluetooth Headset                      | Computer                | 1.780                      | 0.490                 |
| 10 | Netgear Wireless Internet Access                  | Computer                | 3.718                      | 0.490                 |
| 11 | SanDisk Cruzer Mini USB Flash Drive - 4-Pack      | Computer                | 2.331                      | 0.503                 |
| 12 | Logitech Joystick (XS Cargo)                      | Computer                | 2.267                      | 0.516                 |
| 13 | Spindle 100 CDR's                                 | Computer                | 2.930                      | 0.516                 |
| 14 | FM transmitter for Ipod                           | Computer                | 2.787                      | 0.503                 |
| 15 | Compaq USB 2.0 4-port Hub                         | Computer                | 2.894                      | 0.490                 |
| 16 | Wireless headset                                  | Computer                | 3.457                      | 0.490                 |
| 17 | Compaq Notebook Accessory Kit                     | Computer                | -0.392                     | 0.503                 |
| 18 | Iomega 250 GB external Hard drive                 | Computer                | 1.703                      | 0.516                 |
| 19 | Digital Concepts Micro Digital Camera             | Electronics             | 2.768                      | 0.516                 |
| 20 | Centon 2GB MP3 Player w/FM Tuner                  | Electronics             | 1.653                      | 0.503                 |
| 21 | Sennheiser MX500 Dynamic In-Ear Headphones        | Electronics             | 2.348                      | 0.490                 |
| 22 | Energizer Charger and 2-Pack 1700 mAh Batteries   | Electronics             | 2.580                      | 0.490                 |
| 23 | Philips DVP642 DVD Player                         | Electronics             | 2.079                      | 0.503                 |
| 24 | Two Cordless Phone set 2 GHz                      | Electronics             | 1.943                      | 0.516                 |
| 25 | Digital Answering Machine                         | Electronics             | 3.241                      | 0.516                 |
| 26 | Remote car starter                                | Electronics             | 2.384                      | 0.503                 |
| 27 | ViewSonic 19" LCD Monitor                         | Electronics             | 1.053                      | 0.490                 |
| 28 | Apple ipod                                        | Electronics             | 2.353                      | 0.490                 |
| 29 | Samsung MiniDV Camcorder                          | Electronics             | 2.468                      | 0.503                 |
| 30 | Thai Lacquer ware -boxes                          | Handycrafts             | 3.137                      | 0.516                 |
| 31 | Two Burmese hats                                  | Handycrafts             | 2.279                      | 0.516                 |
| 32 | Burmese wall hangings (medium)                    | Handycrafts             | 2.950                      | 0.503                 |
| 33 | Hill tribe dolls                                  | Handycrafts             | 3.155                      | 0.490                 |
| 34 | Two Thai bags                                     | Handycrafts             | 3.054                      | 0.490                 |
| 35 | Barber in a box                                   | Household               | 2.498                      | 0.503                 |

**Table A2: List of Products used in Experiment 2 and Parameter Estimates  
of Fixed Effects Product Dummy Variables (continued)**

|    | <b>Product Description</b> | <b>Product Category</b> | <b>Parameter estimates</b> | <b>Standard error</b> |
|----|----------------------------|-------------------------|----------------------------|-----------------------|
| 36 | SunBeam Premium Foot Spa.  | Household               | 1.990                      | 0.516                 |
| 37 | Instant Alert System       | Household               | 2.286                      | 0.523                 |
| 38 | Luxery wine accessory set  | Household               | 1.884                      | 0.523                 |
| 39 | Waterless Vaporizer        | Household               | 2.515                      | 0.523                 |
| 40 | Shower Mirror              | Household               | -0.777                     | 0.523                 |
| 41 | Sizler knife set           | Household               | 5.244                      | 0.523                 |
| 42 | Decorative Oil bottles     | Household               | 4.557                      | 0.523                 |
| 43 | 45+ Action Videos          | Movies                  | 5.236                      | 0.523                 |
| 44 | Collection of 45+ Videos   | Movies                  | 5.358                      | 0.523                 |
| 45 | Bike helmets -youth        | Sports                  | 5.547                      | 0.523                 |

**Table A3: List of Products used in Experiment 3 and Parameter Estimates  
of Fixed Effects Product Dummy Variables**

| <b>Product description</b> |                                                                            |
|----------------------------|----------------------------------------------------------------------------|
| 1                          | Lot of 8 Action/Adventure Movies!                                          |
| 2                          | Lot of 8 Action Movies!                                                    |
| 3                          | Lot of 8 Action Movies!                                                    |
| 4                          | Lot of 8 Drama Movies!                                                     |
| 5                          | Lot of 8 Drama Movies!                                                     |
| 6                          | Lot of 8 Drama Movies!                                                     |
| 7                          | Lot of 8 Horror Movies!                                                    |
| 8                          | Lot of 8 Horror Movies!                                                    |
| 9                          | Lot of 8 Romance Movies!                                                   |
| 10                         | Lot of 8 Romance Movies!                                                   |
| 11                         | Lot of 8 Drama Movies!                                                     |
| 12                         | Lot of 4 Drama and 4 Action Movies!<br>Combination of 4 Drama and 4 Action |
| 13                         | Movies!<br>Combination of 4 Drama and 4 Action                             |
| 14                         | movies!<br>Combination of 4 Thrillers/Horror and 4                         |
| 15                         | Comedy Movies!                                                             |
| 16                         | Combination of 4 Thrillers/Horror and 4 Comedy M                           |
| 17                         | Lot of 8 Kids Movies!                                                      |
| 18                         | Lot of 8 Kids Movies!                                                      |
| 19                         | Lot of 8 Comedy Movies!                                                    |
| 20                         | Lot of 8 Comedy Movies!                                                    |
| 21                         | Lot of 8 Comedy Movies!                                                    |
| 22                         | Combination of 4 Action and 4 Romance Movies!                              |
| 23                         | Combination of 4 Action and 4 Romance Movies!                              |
| 24                         | Combination of 4 Drama and 4 Comedy Movies!                                |
| 25                         | Combination of 4 Drama and 4 Comedy Movies!                                |
| 26                         | Combination of 4 Thrillers/Horror and 4 Comedy Movies!                     |
| 27                         | Combination of 4 Thrillers/Horror and 4 Comedy Movies!                     |
| 28                         | Combination of 4 Thrillers/Horror and 4 Drama Movies!                      |
| 29                         | Combination of 4 Comedy and 4 Action Movies!                               |
| 30                         | Combination of 4 Comedy and 4 Action Movies!                               |

Figure 1 - Example of a Charity Auction from Experiment 1

Auction Details

**A117. Thai lacquer art – set of 3 Hand-Painted Cats**

|                  |                                  |
|------------------|----------------------------------|
| Starting Bid:    | C\$\$0.01                        |
| Quantity:        | 1                                |
| Winning Bid:     | C\$\$11.00                       |
| Number of Bids:  | 4                                |
| Reserve Status:  | This item has no Reserve.        |
| Buy Price:       | C\$None                          |
| Winning Bidder:  | geert                            |
| Start Date:      | November 2, 2006 8:00:00 PM MDT  |
| End Date:        | November 3, 2006 8:12:00 PM MDT  |
| Seller Location: | Edmonton, Ab                     |
| Seller:          | <a href="#">auctioneer (300)</a> |

Item:  
000033989  


**Current Time**  
May 8, 2007  
10:51:53 PM MDT

**Ended Auction**

- This item is listed in [Art & Antiques](#)
- [View Seller Feedback](#)
- [Ask Seller a Question](#)
- [Bidding History](#)
- Member ID
- Password

Item Details

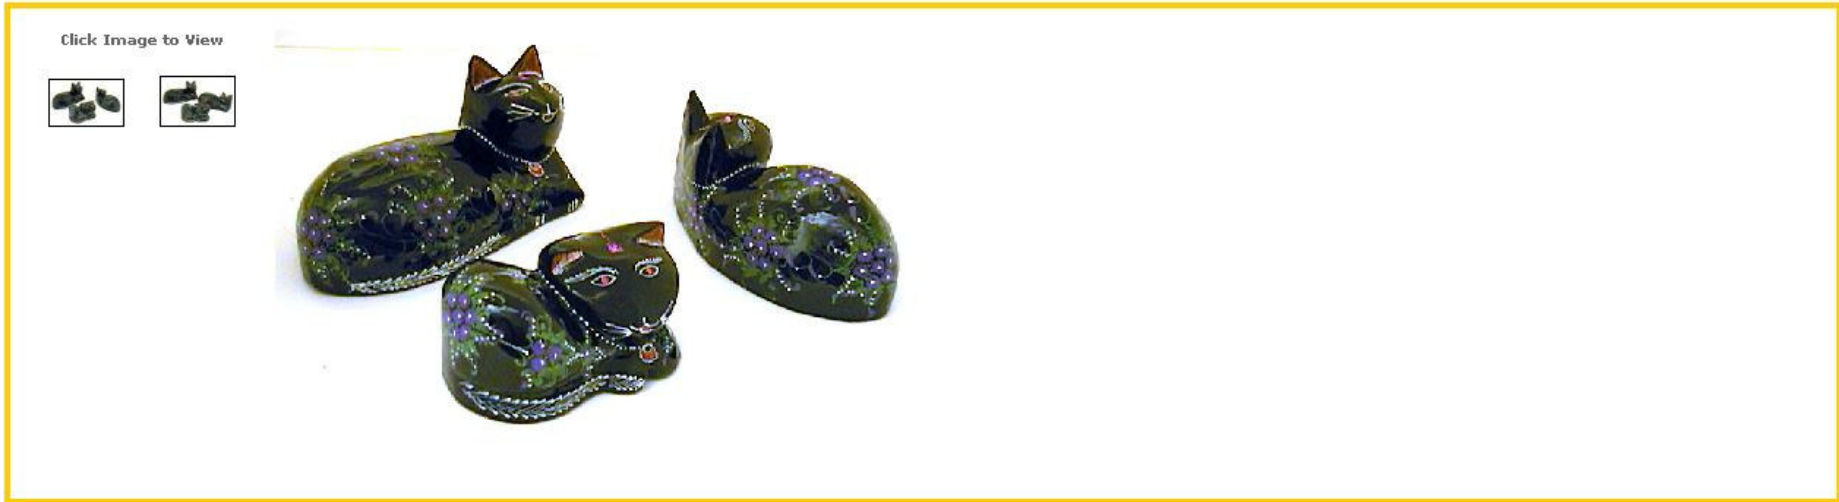

Figure 1 - Example of a Charity Auction from Study 1 (continued)

### Thai lacquer art – set of 3 Hand-Painted Cats

Very attractive decorative set of 3 lacquer ware cats. They are beautifully hand painted high quality lacquer ware, imported from Chiangmai Thailand. These are ideal for gifts or just to have for an ornament.

**100% of the proceeds of this auction will be donated to the Edmonton United Way, Sign of Hope and Christmas Bureau!**

#### Payment Terms

Cash only.

#### Bid

Your bid is legally binding. Place a bid only if you're serious about buying the item.

|                       |                           |
|-----------------------|---------------------------|
| Current Bid:          | \$11.00                   |
| Bid Increment:        | \$1.00                    |
| Minimum for next bid: | \$12.00                   |
| Reserve Status:       | This item has no Reserve. |
| Buy Price:            |                           |

|                                                                     |                          |
|---------------------------------------------------------------------|--------------------------|
| Your Bid:                                                           | <input type="text"/>     |
| <input type="checkbox"/> Check to Watch Item Without Bidding        |                          |
| Member ID:                                                          | <input type="text"/>     |
| Password:                                                           | <input type="password"/> |
| <a href="#">If you forgot your username or password, click here</a> |                          |
| <input type="button" value="Place My Bid"/>                         |                          |

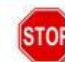

#### How to bid

##### How to enter your Bid:

Use no currency symbols, no commas - only numbers and decimal points, Example: 2500 for 2,500.00.

**How Much To Bid?** Enter the most you are willing to pay here. The auction system will place the lowest bid necessary for you now, and then will bid on your behalf if someone else bids against you, up to the point of the bid placed here.

**What is a Reserve?** A reserve price means that a seller may set a price that bids must meet in order to complete the sale. This amount is hidden. If the reserve price isn't met, the seller is not obligation to sell the item. If you wish to request the reserve price, please write the seller directly. It is at their discretion whether this price will be provided.

**Buy Price** If an item has a Buy Price listed, the auction will end immediately if that amount is bid.

##### To Track this item without bidding:

You can watch this item without bidding by checking the box provided. You will be able to see this item in your Tracked Items list in the Members Area. Enter your Member ID and Password here, and click the Place My Bid Button.

Lost Password?
